# Supplementary material for: Arctic coastal benthos long-term responses to perturbations under climate warming
Source: Philos Trans A Math Phys Eng Sci. 2020 Aug 31;378(2181):20190355. doi: 10.1098/rsta.2019.0355 (PMC7481664; doi:10.1098/rsta.2019.0355)
Supplement: Data files [file rsta20190355supp2.xlsx]

## Sheet: SBF
Smeerenburgfjorden
Year	Treatment	Styelidae	Crabs	Brittlestars	Gastropoda	Polychaeta	Starfish	Barnacles	Boltenia	Halocynthia pyriformis	Hiatella arctica	Caridea	Anemones	Seaspiders	Spirorbis spirorbis	Urchin	Chiton	Porifera	Botryl (%)	Bryozoa (%)	Didem (%)	Grantia (%)	Haliclona (%)	Hildenbrandia (%)	Hydrozoa (%)	Calc_algae	Phycodrys rubens (%)	Macroalgae (%)
1980_1	Manipulated	64.8394	0	1.20073	1.20073	0	3.60219	148.89	3.60219	7.20438	19.2117	19.2117	0	0	0	0	15.6095	0	10.9366	0.0588512	0.010699	0	9.44596	0.396062	2.26208	55.3939	0	0
1980_2	Manipulated	7.11609	0	0	0	0.889511	0	3.55804	0	0.889511	1.77902	3.55804	0	0	0	0	8.89511	0	0.898917	0	0	0	0.83467	0.107957	0	21.7389	0	0
1982	Manipulated	6.23388	0.890554	0	3.56222	0	0	6.23388	0	0.890554	1.78111	48.0899	0	0	58.1247	0.890554	24.9355	0	2.58254	0.196626	0	0	1.57155	0.430667	4.34853	40.9987	0	2.69325
1984	Manipulated	6.41614	0	0	0.916592	0.916592	0	3.66637	0	1.83318	0	67.8278	0	0	0	0	27.4978	0	4.69925	0.351445	0	0	2.34223	0.535409	9.10531	34.6213	0	22.9764
1986	Manipulated	1.78648	0	0	1.78648	0	0	5.35944	0	2.67972	2.67972	16.0783	0	0	31.5296	0.89324	30.3701	0	2.31836	1.5561	0.0652719	0	4.17116	0.565942	16.2689	42.7528	0	0.185786
1988	Manipulated	9.14741	1.01638	0	10.1638	0	0	18.2948	1.01638	2.03276	3.04914	69.1138	0	0	103.567	1.01638	19.3112	0	8.47338	1.74759	0.0138224	0	4.97176	0.880013	14.894	34.625	0	0.29405
1990	Manipulated	21.8446	0.949766	0	3.79906	0	0	121.57	0.949766	0	3.79906	35.1413	0	0	54.3988	0.949766	38.9404	0	4.00101	0.640913	0.534449	0	8.47446	0.625589	3.2586	36.1835	0.0303746	1.165
1992	Manipulated	29.3918	0	0	2.84437	0	0	142.218	2.84437	0	0	41.7174	0	0	226.69	1.89625	44.5618	0	4.99477	2.96139	0.738454	0	9.10692	1.80121	15.8109	34.9485	0.392063	1.65627
1994	Manipulated	19.5243	0	0.929728	0.929728	0.929728	0	102.27	0.929728	0	7.43782	28.8216	0	2.78918	48.2975	0	46.4864	0	10.5517	7.90828	0.18139	0	10.3917	0.787618	4.08799	25.3373	0.324096	4.25632
1996	Manipulated	30.5301	3.81626	0	1.90813	0.954065	0	77.2792	1.90813	0.954065	0	68.6926	0	1.90813	523.575	0	25.7597	0	6.9997	11.0023	0.448431	0.0247	8.35389	0.753173	3.33582	15.2553	0.829855	3.05529
1998	Manipulated	19.3806	0	0	3.2301	1.0767	0	92.5961	0	3.2301	7.53689	79.6757	0	0	106.128	0	24.7641	0	5.36131	13.8261	0.0708981	0.00233754	6.62091	0.882425	7.10826	25.5425	0.937518	2.12066
2000	Manipulated	19.2896	1.07165	0	1.07165	0	0	123.239	0	5.35823	7.50152	73.9435	0	0	237.667	3.21494	21.4329	0	2.56651	24.9035	0.0121789	0	5.83473	0.771247	10.1473	20.007	1.60106	16.4638
2002	Manipulated	5.31942	1.06388	0	5.31942	2.12777	1.06388	119.155	1.06388	3.19165	6.38331	35.1082	0	2.12777	595.888	0	22.3416	1.06388	4.76369	10.3652	0.00410513	0	3.05627	0.907733	6.30192	23.7078	9.34585	27.6224
2004	Manipulated	2.18631	1.09316	0	0	0	1.09316	92.9184	1.09316	1.09316	0	37.1673	0	1.09316	333.444	1.09316	6.55894	0	4.65695	19.7953	0	0	2.52631	0.460559	1.33645	11.6709	12.1332	47.0195
2006	Manipulated	3.99068	0	0	4.98835	0	0	81.809	0.99767	0.99767	5.98602	26.9371	0	0	1665.77	0	1.99534	0	5.57665	28.6375	0.0277378	0	2.13514	0.444556	0.461607	17.912	19.2497	35.3277
2008	Manipulated	13.0899	1.09082	0	10.9082	0	1.09082	55.632	0	0	11.999	10.9082	0	0	1532.16	0	7.63576	0	2.43627	10.1379	0.36547	0	0.400071	0.423089	0.9096	17.1576	34.7521	56.7609
2010	Manipulated	8.64172	0	0	0.960191	0	0.960191	82.5764	0	3.84076	4.80096	27.8455	0	0.960191	2015.02	0	8.64172	0	5.82908	20.9586	0.0270514	0	0.0896961	0.852431	0.623034	23.6865	21.5386	34.6496
2012	Manipulated	16.6738	0	0	0.926323	0	1.85265	59.2847	0.926323	0.926323	2.77897	6.48426	0	0	1392.41	0	0.926323	1.85265	4.82954	21.3832	0.044536	0	0.0283398	0.510985	0	13.4812	44.0753	55.4344
2013	Manipulated	9.12579	0	0	3.04193	0	0	30.4193	0	0	1.01398	5.06989	0	0	2393.29	0	4.05591	0	2.13319	11.7052	0.0898403	0	0	0.613191	0.850053	11.5539	40.9818	61.4461
2015	Manipulated	51.4158	0.902031	0	6.31422	0	0	44.1995	0.902031	3.60812	18.9427	60.4361	0	0	5561.17	1.80406	17.1386	2.70609	3.15039	28.0695	0.0494765	0	0	0.755786	0.128072	17.4377	32.6661	42.2824
2017	Manipulated	153.112	0	3.87626	3.87626	13.5669	0	209.318	1.93813	0.969066	54.2677	9.69066	1.93813	0	1735.47	0.969066	77.5253	0	4.13857	20.4255	0.00716235	0	0	1.39243	0.272984	29.9246	24.6792	32.7849
1980	Control	175.701	7.54545	1.07792	0	0	1.07792	144.442	9.7013	16.1688	42.039	0	0	0	0	0	6.46753	0	2.35345	0.297175	0.0339965	0	4.60945	0.099455	12.3754	55.352	0	1.29203
1980	Control	175.701	7.54545	1.07792	0	0	1.07792	144.442	9.7013	16.1688	42.039	0	0	0	0	0	6.46753	0	2.35345	0.297175	0.0339965	0	4.60945	0.099455	12.3754	55.352	0	1.29203
1982	Control	104.887	0	4.76757	3.57568	11.9189	4.76757	141.835	7.15136	13.1108	38.1406	16.6865	0	0	0	0	7.15136	0	3.31426	0.476558	0.0634829	0	6.65783	0	3.62904	49.757	0	1.44598
1984	Control	117.828	4.02829	1.00707	3.02122	3.02122	0	183.287	11.0778	16.1132	47.3324	49.3466	1.00707	0	0	1.00707	9.06365	0	9.09199	0.848163	0	0	8.7218	0.141466	12.5649	47.6252	0	2.97721
1986	Control	83.225	0	0	2.16169	0	0	94.0334	9.72759	11.8893	22.6977	7.56591	0	0	0	3.24253	15.1318	0	10.0907	0.0766442	0	0	11.1065	0	14.0133	38.6383	0	4.18478
1988	Control	114.78	0	0	6.75176	0	1.35035	184.998	1.35035	18.9049	6.75176	14.8539	1.35035	0	0	0	2.7007	0	6.39774	0	0.0169708	0	5.77696	0.0399066	15.9206	33.86	0	2.17266
1990	Control	158.454	0	3.19036	2.1269	2.1269	0	197.802	4.25381	15.9518	36.1574	10.6345	0	0	0	1.06345	6.38071	0	5.87395	1.47572	0.0274066	0	8.14115	0.18326	6.06442	41.3997	0.225844	3.92941
1992	Control	230.005	1.06484	1.06484	2.12967	2.12967	1.06484	154.401	7.45386	9.58353	37.2693	6.38902	0	0	0	0	19.1671	0	3.33042	0.0706534	0.0207436	0	13.6989	0	9.30118	38.2036	0.468823	6.60484
1994	Control	205.776	0.989308	2.96792	0	0.989308	0.989308	79.1446	9.89308	7.91446	16.8182	13.8503	0	0	0	0	23.7434	0	10.8967	2.28246	0.0759854	0	19.6378	0	7.51246	22.2168	0.373112	8.34231
1996	Control	221.625	1.06551	3.19652	0	26.6377	0	86.306	4.26203	8.52405	11.7206	63.9304	0	0	0	1.06551	23.4411	0	9.23916	5.45672	0.0183063	0	16.7977	0.222007	8.64985	20.2868	0.778968	6.84044
1998	Control	144.898	0	1.13202	4.52807	0	1.13202	49.8087	3.39605	6.7921	6.7921	52.0728	0	0	11.3202	0	7.92412	0	3.58219	8.16408	0.0354351	0	14.7039	0	9.50067	24.9253	1.77651	6.41452
2000	Control	93.3563	0	7.09035	0	0	0	44.9056	0	3.54518	37.8152	37.8152	0	0	0	3.54518	11.8173	0	3.73155	14.0649	0.0592429	0	11.2365	0.115495	9.16618	23.891	2.04027	14.5107
2002	Control	54.6514	2.02413	2.02413	0	1.01206	4.04825	37.4463	0	2.02413	40.4825	7.08444	0	1.01206	0	2.02413	4.04825	0	5.59794	4.4148	0	0.00234185	11.0752	1.05801	6.23633	21.6874	3.69276	38.5494
2004	Control	55.3244	0	0	0	0	1.15259	10.3733	0	4.61037	4.61037	18.4415	0	0	172.889	0	0	0	5.71604	20.8074	0	0	5.60334	0.083151	2.66611	13.8122	3.7473	33.7643
2006	Control	9.83681	0	0	0	0	0.983681	8.85313	0	2.95104	20.6573	6.88577	0	0	245.92	0	0.983681	0	5.13842	16.5372	0	0	6.19063	0.288871	3.14964	25.7748	10.5721	31.0456
2008	Control	49.8566	0	1.1331	6.79863	21.529	1.1331	16.9966	0	6.79863	26.0614	2.26621	0	0	566.552	1.1331	2.26621	0	4.40812	2.69097	0	0	1.37217	0	1.13828	30.2776	10.7445	35.878
2010	Control	50.4868	0.855709	0	0.855709	0	0	10.2685	0	0	21.3927	9.4128	0	0	5168.48	0	5.13425	0	7.92146	10.4711	0.0370526	0	0.348181	0.839778	0.652326	37.7936	8.03985	37.9385
2012	Control	38.0825	0	0	0	0	0	31.907	0	6.17554	0	5.14628	0	0	1471.84	1.02926	0	0	5.80636	22.1351	0.054038	0	0.313664	0	0	32.0795	13.5832	23.6796
2013	Control	38.2576	2.31864	1.15932	6.95592	0	0	15.0712	0	5.7966	1.15932	2.31864	1.15932	1.15932	1889.69	2.31864	5.7966	0	2.83877	12.9622	0.00534914	0	0.114196	2.50818	0	28.48	2.18294	36.3783
2015	Control	115.721	1.03323	5.16614	7.23259	0	0	9.29905	0	8.26582	35.1297	28.9304	1.03323	2.06646	3574.97	5.16614	11.3655	0	3.58164	17.3783	0.0371802	0	0.0517988	1.51771	0	31.0638	5.53867	35.1079
2017	Control	195.407	3.03741	0	3.03741	9.11223	1.01247	56.6983	1.01247	3.03741	125.546	10.1247	2.02494	0	540.598	5.06235	61.7606	5.06235	4.79921	8.22933	0.0136067	0.174787	0	2.34791	0.51907	37.4852	16.4461	28.4128

## Sheet: KF
Kongsfjorden
Year	Treatment	Halocynthia	Hiatella arctica	Hyas spp.	Caridea	Pagurus	Urchin	Barnacles	Bivalvia	Chlamys islandica	Gastropoda	Tonicella	Urticina eques	Styela rustica	Polychaeta	Crossaster	Henricia spp.	Gersemia rubiformis	Boltenia echinata	Ophiuridae	Dendrodoa aggregata	Bryozoa	Flabelina	Desmarestia (%)	Calc_algae (%)	Hildenbrandia (%)	Porifera (%)	Hydrozoa (%)	Phycodrys (%)	Botryllus (%)
1980	Control	1.83	7.32	0.92	0	0	9.15	24.71	8.24	2.75	10.07	41.18	120.78	1.83	0.48	0	0	0	0	0	0	0	0	0.13	62.42	0.15	0	0	0	0
1981	Control	4.4	0.88	0	0.88	0	13.19	33.42	2.64	0	8.79	45.73	100.25	4.4	0	0	0	0	0	0	0	0	0	0.71	59.58	0	0.22	0	0	0
1982	Control	4.89	0	0	0.98	0	13.68	15.63	3.91	0	10.75	42.01	91.84	2.93	0	0	0	0	0	0	0	0	0	5.66	66.43	0	0.05	0	0	0
1983	Control	3.83	0	0	11.49	0	23.94	22.03	7.66	0	23.94	63.21	118.76	2.87	0	0	0	0	0	0	0	0	0	9.67	65.63	0	0.67	0.31	0	0
1984	Control	5.33	0	0	10.67	0	16	10.67	0.89	0	29.33	31.11	148.43	0.89	0	0.89	0	0	0	0	0	0	0	2.84	58.34	0.4	1.14	0	0	0
1985	Control	17.74	1.87	0	31.75	0	19.61	27.08	3.74	0.93	12.14	39.22	129.81	3.74	0	0	0	0	0	0	0	0	0	7.28	61.89	0.28	0.5	0.04	0	0
1986	Control	5.18	2.59	0	3.45	0.86	12.09	26.77	3.45	2.59	13.82	37.99	162.34	0.86	0	0	0	0	0	0	0	0	0	0.16	62.83	0.14	0.11	0.18	0	0
1987	Control	20.64	4.91	0.98	0.98	0	21.62	22.6	7.86	0.98	9.83	37.34	242.72	0	0	0	0	0	0	0	0	0	0	13.26	55.58	0.04	0.64	1.37	0	0
1988	Control	13.29	3.54	0	0.89	2.66	19.49	26.57	2.66	0	9.74	71.75	165.63	0	0	0	0	0	0	0	0	0	0	2.81	63.13	0.13	0.02	0	0	0
1989	Control	7.18	0.9	21.54	0	0	24.23	28.72	4.49	1.8	13.46	40.39	229.78	2.69	0.9	0	0	0	0	0	0	0	0	5.93	66.16	0.19	0.05	0.05	0	0
1990	Control	12.86	0	0	4.95	1.98	19.79	34.63	6.93	0	14.84	22.76	263.19	0	0	0.99	0	0	0	0	0	0	0	12.71	57.42	0.29	0.14	0.14	0	0
1991	Control	7.27	0	0	2.08	4.15	15.57	25.95	2.08	0	19.72	28.02	207.58	0	0	0	0	0	0	0	0	0	0	14.33	60.67	0.13	0.22	0.85	0	0
1992	Control	9.61	1.92	0	12.5	1.92	26.92	27.88	4.81	0	10.58	33.65	242.29	0.96	0.96	0	0.96	0	0	0	0	0	0	6.36	57.74	0.05	0.04	0.26	0	0
1993	Control	11.41	8.55	0	5.7	2.85	21.39	55.6	7.13	0	27.09	27.09	283.72	1.43	0	0	0	0	0	0	0	0	0	37.75	66.21	0.41	0.23	0	0	0
1994	Control	23.52	0	0	4.52	0	17.19	24.42	9.95	3.62	9.05	20.8	258.7	0.9	0	0	0	0	0	0	0	0	0	4.09	72.16	0.25	0.96	1.21	0	0
1995	Control	19.67	3.93	0	0	0	39.34	70.81	0	0	27.54	90.48	133.75	0	0	0	0	0	0	0	0	0	0	79.08	54.11	0	1.2	0	0	0
1996	Control	38.79	0	0	7.76	0	31.03	69.82	15.52	3.88	19.39	46.55	58.18	3.88	0	0	0	0	0	0	0	0	0	79	63.85	0.18	0.27	0	0	0
1997	Control	25.77	5.95	0	3.96	0	23.79	67.4	5.95	1.98	17.84	37.66	91.19	3.96	1.98	0	0	0	0	0	0	0	0	47.21	64.33	0.06	0.45	0	0	0
1998	Control	15.04	9.67	0	6.45	0	22.56	31.16	0	0	11.82	33.31	81.65	1.07	0	0	0	0	0	0	0	0	0	5.46	57.3	0	0	0	0	0
1999	Control	40.54	13.51	0	13.51	6.76	81.07	40.54	0	0	27.02	81.07	128.36	0	0	0	0	0	0	0	0	0	0	87.84	64.29	0	3.21	0	0	0
2000	Control	9.07	6.05	0	7.56	0	58.96	13.61	3.02	4.54	22.68	22.68	36.28	1.51	0	0	0	0	0	0	0	0	0	41.15	59.48	0	0.08	0	0	0
2001	Control	0	3.9	0	0	7.79	66.22	77.91	11.69	0	15.58	31.16	27.27	0	0	0	0	0	0	0	0	0	0	70.37	82.86	0	0.45	0	0	0
2002	Control	4.22	6.32	0	8.43	0	63.24	71.67	31.62	2.11	18.97	25.29	86.42	6.32	4.22	0	0	0	0	0	0	0	0	44.33	82.39	0.33	0	0	0.03	0
2003	Control	3.95	19.77	0	20.76	0	25.7	41.52	14.83	0	39.54	80.08	93.92	9.89	1.98	0	0	0	0	0	0	0	0	1.78	50.67	0.47	0.13	0.06	0	0
2004	Control	0	0	0	13.92	4.64	10.44	10.44	0	0	20.88	24.36	74.23	0	0	0	0	0	0	0	0	0	0	16.39	67.97	1.44	0.19	0	0	0
2006	Control	1.3	1.3	0	0	0	1.3	25.92	5.18	0	0	5.18	33.69	0	0	0	0	0	0	0	0	0	0	49.69	66.09	0	0.22	0	0	0
2007	Control	2.99	2.99	0	0	4.49	10.47	16.45	0	0	28.42	22.43	94.23	0	5.98	0	0	0	0	0	0	0	0	48.9	62.17	0	0	0	0	0
2008	Control	1.76	1.76	0	0	0	12.33	23.78	1.76	0	17.62	37.88	160.31	1.76	3.52	0	0	0.01	0	0	0	0	0	8.13	58.58	1.26	0.24	2.09	0	0
2009	Control	3.04	3.04	0	1.01	0	13.16	41.5	7.08	0	19.23	7.08	266.18	0	1.01	0	0	0	0	0	0	0	0	22.1	64.2	0	0	0	0	0
2010	Control	5.82	2.91	0	5.82	1.45	20.37	33.46	1.45	0	23.28	7.27	162.93	1.45	1.45	0	0	0	0	0	0	0	0	42.32	67.69	0	0.03	0.24	0	0
2011	Control	3.69	0.92	0	2.77	0	18.46	29.53	6.46	0	15.69	9.23	140.26	2.77	1.85	0	0.92	0	0.92	0	0	0	0	7.23	63.5	0	0.12	0.03	0	0
2012	Control	1.75	0.88	0	0.88	0	20.17	34.21	14.91	0	12.28	11.4	104.37	2.63	2.63	0	0.88	0	0	0	0	0	0	0.07	67.43	0	0	0	0	0
2013	Control	1.04	1.04	0	2.08	0	16.66	31.25	19.79	0	23.96	8.33	111.44	0	1.04	0	0	0	0	0	0	0	0	0	65.54	0	0.02	0	0	0
2014	Control	0	0.86	1.71	0.86	0.86	19.68	32.51	7.7	0	5.99	19.68	154.01	1.71	0	0	0.86	0	1.71	0	0	0	0	0.15	70.84	0	0	0	0.4	0
2015	Control	0	41.73	2.5	7.51	0	31.71	29.21	0	0	24.2	25.04	202.8	0.83	2.5	0	0	0	0	6.68	0	0	0	0.17	78.76	0	0	0	0.06	0
2017	Control	2.88644	30.7887	0	2.88644	0	40.4101	23.0915	0	0	8.65931	18.2808	246.309	1.92429	2.88644	0	0	0	0	0.962145	0	0	0	11.7216	81.8442	0	0	0	0	0
1980	Manipulated	8.88	5.33	0.89	1.78	1.78	4.44	2.67	2.67	0.89	22.21	58.64	30.21	0.89	0	0	0	0	0	0	0	0	0	0.11	74.85	0.22	0.08	0	0	0
1981	Manipulated	0	0.95	0	0	0.95	14.3	0	2.86	0	10.49	46.72	38.14	2.86	0.95	0	0	0	0	0	0	0	0	1.12	62.64	0	0	0	0	0
1982	Manipulated	1.94	3.87	0	0	0	23.23	0.97	2.9	0	20.33	55.18	36.79	3.87	0	0	0	0	0	0	0	0	0	2.35	67.96	0	0.37	0	0	0
1983	Manipulated	2.03	0	0	4.05	0	17.22	0	2.03	0	23.3	52.67	29.38	1.01	0	0	0	0	0	0	0	0	0	11.58	67.71	0	0	0	0	0
1984	Manipulated	9.15	10.98	0	0.91	11.89	29.27	0	0.91	0	36.58	37.5	59.45	0	0	0	0	0	0	0	0	0	0	4.78	60.95	0.66	0.1	0	0	0
1985	Manipulated	4.38	1.1	0	19.72	9.86	26.3	0	1.1	2.19	23.01	33.97	63.55	0	0	0	0	0	0	0	0	0	0	21.9	64.32	0.11	0.31	0	0	0
1986	Manipulated	7.7	2.57	0	11.12	4.28	14.54	0.86	0.86	0.86	18.82	70.14	112.92	0.86	0	0	0	0	0	0	0	0	0	0.97	65.55	0.17	0.03	0	0	0
1987	Manipulated	13.38	3.09	0	2.06	2.06	21.61	0	3.09	0	8.23	45.27	170.79	1.03	0	0	0	0	0	0	0	0	0	15.9	65.72	0.12	0.22	0.33	0	0
1988	Manipulated	13.24	0	0	5.29	7.06	19.41	0	6.18	0	14.12	111.18	171.18	0	0	3.53	0	0	0	0	0	0	0	3.08	61.28	0.16	0	0	0	0
1989	Manipulated	9.86	1.79	0	17.93	3.59	8.07	0.9	5.38	0	8.07	52.9	265.38	0.9	0.9	0	0	0	0	0	0	0	0	3.75	70.59	0.22	0.01	0	0	0
1990	Manipulated	11.53	1.92	0	0.96	3.84	23.07	5.77	9.61	0.96	30.76	37.49	248.96	1.92	0.96	0	0	0	0	0	0	0	0	10.43	61.57	0.23	0.19	0.05	0	0
1991	Manipulated	18.83	8.24	0	3.53	7.06	15.3	3.53	5.89	0	48.26	31.78	254.24	0	1.18	0	0	0	0	0	0	0	0	25.45	59.99	0.22	0.12	0	0	0
1992	Manipulated	11.15	4.64	0	3.72	6.5	31.58	0.93	0	1.86	19.51	54.8	254.5	5.57	0	0	0	0	0	0	0	0	0	3.98	54.37	0.08	0	0.05	0	0
1993	Manipulated	6.82	4.09	0	2.73	1.36	31.37	15	4.09	0	46.37	42.28	235.95	2.73	0	0	0	0	0	0	0	0	0	35.7	75.49	0.06	0.19	0	0	0
1994	Manipulated	25.83	0	0	0.92	8.3	18.45	0.92	3.69	0.92	18.45	11.99	234.34	0.92	0	0	0	0	0	0	0	0	0	4.64	60.94	0.11	1.69	0.61	0	0
1995	Manipulated	33.47	1.86	0	0	0	13.01	7.44	1.86	0	13.01	100.4	94.82	0	0	0	0	0	0	0	0	0	0	54.52	71.7	0.38	0.98	0	0	0
1996	Manipulated	12.91	0	0	5.17	7.75	33.58	0	5.17	0	23.25	54.24	15.5	2.58	0	0	0	0	0	0	0	0	0	67.36	67.64	0.11	0.89	0	0	0
1997	Manipulated	21.57	17.53	0	2.7	1.35	20.22	5.39	1.35	0	36.4	31.01	95.73	4.04	0	0	0	0	0	0	0	0	0	18.39	64.91	0.21	1.22	0	0	0
1998	Manipulated	15.22	0	0	8.12	0	19.28	11.16	3.04	0	18.26	30.44	55.81	1.01	0	0	0	0	0	0	0	0	0	2.69	56.84	0	0.1	0	0	0
1999	Manipulated	24.02	0	9.61	0	4.8	33.63	57.65	19.22	4.8	33.63	48.04	28.82	4.8	0	4.8	0	0	0	0	0	0	0	82.99	54.26	0	0	0	0	0
2000	Manipulated	11.24	3.75	0	7.49	0	48.69	63.67	0	7.49	22.47	59.93	29.96	3.75	0	0	0	0	0	0	0	0	0	77.41	66.17	0.27	0.28	0	0	0
2001	Manipulated	0	6.68	0	5.01	0	35.07	16.7	6.68	0	56.78	35.07	41.75	1.67	0	0	0	0	0	0	0	0	0	43.32	73.17	0.17	0.01	0	0	0
2002	Manipulated	1.18	10.59	0	7.06	1.18	45.88	9.41	8.23	1.18	48.23	30.58	91.75	8.23	2.35	0	0	0	0	0	0	0	0	13.65	79.2	0.92	0.18	0	0	0
2003	Manipulated	3.07	3.07	0	9.22	5.12	26.63	10.24	3.07	1.02	34.82	64.52	96.27	4.1	2.05	0	0	0	0	0	0	0	0	1.76	69.08	0.48	0.42	0	0	0
2004	Manipulated	0	14.433	0	15.6357	1.20275	28.866	56.5292	1.20275	0	22.8522	36.0824	110.653	1.20275	0	0	0	0	0	0	0	0	0	19.647	53.3522	0.0221739	0	0	0	0
2006	Manipulated	3.16917	11.0921	0	7.92294	0	36.4455	0	0	0	15.8459	25.3534	60.2143	3.16917	15.8459	0	0	0	0	0	0	0	0	34.2159	51.096	0	0.145118	0	0	0
2008	Manipulated	0	13.0563	0	2.79777	0	22.3822	3.73037	0	0	37.3037	54.0903	222.889	1.86518	0.932591	0	0	0	0	0	0	0	0	5.88894	51.8773	0.017218	0	0	0	0
2010	Manipulated	0	12.9611	0	14.9551	4.98504	22.9312	2.99103	0	0	45.8624	14.9551	203.39	1.99402	0	0.997008	0	0	0	0	0	0	0	16.1102	56.1145	0.0262774	0	0	0	0
2012	Manipulated	0.847508	0	0	1.69502	0	16.9502	11.0176	0	0	21.1877	26.2728	110.176	0	0	0	0	0	0	0	3.39003	0	0	0	82.2975	0	0	0	0	0
2013	Manipulated	0.924457	1.84891	0	3.69783	0	21.2625	2.77337	0	0	19.4136	20.3381	106.313	0	0	0	0.924457	0	0	0.924457	0	0	0	0	75.0159	0	0	0	0	0
2015	Manipulated	2.46092	90.2338	0.820307	22.1483	0	27.8905	8.20307	0	0	25.4295	18.8671	208.358	0	4.10154	0	0	0	0	3.28123	0	1.64061	0.820307	0	82.7912	0	0	0	0	0.02033
2017	Manipulated	0	10.4084	3.78487	5.67731	1.89244	38.795	3.78487	0	0	4.73109	24.6017	201.545	0	1.89244	0	0	0	0	7.56975	4.10154	0	0	12.4288	72.3562	0	0	0	0	0

## Sheet: Traits
		Taxa
Trait	Modality	Balan	Bolten	Botryl	Bryoz	Dendr	Didem	Grantia	HalocP	Henri	HiatAr	Hyas	Hydroz	margarites	Natan	Nymph	Ohiura	Pagurus	Polycha	Pteras	SeaAne	Spiror	Haliclona	Strongy	StyeRu	Tonicel
Body size	s	0	0	0	0	0	0	0	0	0	0	0	0	1	0	1	1	0	0	0	0	1	0	0	0	0
	s/m	1	1	0	1	1	1	1	0	0	1	0	0	1	1	1	1	1	1	0	0	0	0	0	0	1
	m	0	0	0	1	1	1	0	0	0	0	1	1	0	0	0	0	1	0	0	0	0	0	1	1	0
	m/l	0	0	0	0	0	0	0	1	1	0	0	0	0	0	0	0	0	0	1	1	0	0	0	0	0
	l	0	0	1	0	0	0	0	0	1	0	0	0	0	0	0	0	0	0	0	0	0	1	0	0	0
	indet	0	0	1	0	0	0	0	0	0	0	0	0	0	0	0	0	0	0	0	0	0	1	0	0	0
Living habitat	free_living	0	0	0	0	0	0	0	0	1	0	1	0	1	1	1	1	1	1	1	0	0	0	1	0	1
	crevice_dwelling	0	0	0	0	0	0	0	0	0	1	0	0	1	0	0	0	0	0	0	0	0	0	0	0	0
	tube_dwelling	0	0	0	0	0	0	0	0	0	0	0	0	0	0	0	0	0	0	0	0	1	0	0	0	0
	burrowing	0	0	0	0	0	0	0	0	0	1	0	0	0	0	0	1	0	0	0	0	0	0	0	0	0
	epi_endozoic_phytic	0	0	0	1	1	1	0	0	0	0	0	0	1	0	1	0	1	0	0	0	1	0	0	0	0
	attached	1	1	1	1	1	1	1	1	0	1	0	1	0	0	0	0	0	0	0	1	1	1	0	1	0
Feeding mode	surf/dep_feed	0	0	0	0	0	0	0	0	0	0	1	0	1	0	0	1	1	1	0	0	0	0	1	0	1
	filter/susfeeder	1	1	1	1	1	1	1	1	1	1	0	1	0	0	0	1	1	1	0	0	1	1	0	1	0
	graze	0	0	0	0	0	0	0	0	0	0	0	0	0	0	0	0	0	1	0	0	0	0	1	0	1
	op/scavenger	0	0	0	0	0	0	0	0	0	0	1	0	0	0	0	1	1	1	0	0	0	0	0	0	0
	pred	0	0	0	0	0	0	0	0	1	0	1	1	1	1	1	1	1	1	1	1	0	1	0	0	0
Relative adult mobility	nomomb	1	1	1	1	1	1	1	1	0	0	0	1	0	0	0	0	0	0	0	0	1	1	0	1	0
	lowmob	0	0	0	0	0	0	0	0	0	1	1	0	1	0	0	1	1	1	0	1	0	0	1	0	1
	medmob	0	0	0	0	0	0	0	0	1	0	1	0	0	0	1	1	1	0	1	0	0	0	0	0	0
	highmob	0	0	0	0	0	0	0	0	0	0	0	0	0	1	0	0	0	0	1	0	0	0	1	0	0
Sociability	sol	0	1	0	0	0	0	0	1	1	0	1	0	1	1	1	1	1	1	1	1	0	0	0	1	1
	greg	1	0	0	0	0	0	0	0	0	1	0	0	0	0	0	0	0	0	0	0	1	0	1	0	0
	col	0	0	1	1	1	1	0	0	0	0	0	1	0	0	0	0	0	0	0	0	0	1	0	0	0
Longevity	1_2yr	0	0	1	0	1	1	0	0	0	0	0	1	1	0	1	0	0	0	0	0	1	0	0	1	0
	3_5yr	0	1	0	1	0	0	0	1	1	0	1	0	0	1	0	1	1	1	1	0	0	0	0	0	1
	6_10yr	1	0	0	1	0	0	0	0	0	0	1	0	0	1	0	1	1	0	0	0	0	0	0	0	0
	10_20yr	1	0	0	0	0	0	0	0	0	0	0	0	0	0	0	0	0	0	0	0	0	0	0	0	0
	ov20yr	0	0	0	0	0	0	1	0	0	1	0	0	0	0	0	0	0	0	0	1	0	1	1	0	0
Egg/larval dispersal	1_10m	0	1	1	1	1	1	1	1	0	0	0	1	1	0	0	0	0	0	1	0	1	1	0	1	0
	10_100m	0	0	0	1	1	0	1	1	0	0	0	1	0	0	1	0	0	0	0	0	1	1	0	1	1
	100m_1km	0	0	0	0	0	0	0	0	0	0	0	0	0	0	0	0	0	0	0	0	0	0	0	0	1
	1_10km	0	0	0	0	0	0	0	0	0	0	0	0	0	0	0	0	1	0	0	0	0	0	0	0	0
	ov10km	1	0	0	0	0	0	0	0	1	1	1	0	0	1	0	1	0	0	0	1	0	0	1	0	0
Reproduction mode	Asex	0	0	1	1	1	1	0	0	0	0	0	1	0	0	0	0	0	1	0	1	0	1	0	1	0
	Sex	1	1	1	1	1	1	1	1	1	1	1	1	1	1	1	1	1	1	1	1	1	1	1	1	1
Development mode	Lecitho	0	1	1	1	1	1	1	1	1	0	0	1	1	0	0	0	0	1	1	1	1	1	0	1	1
	Plankto	1	0	0	0	0	0	0	0	0	1	1	0	0	1	1	1	1	1	0	1	0	0	1	0	0

## Sheet: CWM
Manipulated
Traits	1980_1	1980_2	1982	1984	1986	1988	1990	1992	1994	1996	1998	2000	2002	2004	2006	2008	2010	2012	2013	2015	2017
small	0.767979	0	3.12512	0.45043	1.57	5.08343	2.81122	5.95075	3.98	8.82455	2.40345	5.50951	13.452	7.56666	76.7482	51.9025	65.0644	51.3813	115.727	145.757	30.3284
small_medium	245.935	20.7947	77.5271	137.506	238.078	387.019	601.215	775.918	1435.72	2384.49	2143.96	2860.27	1517.78	2261.14	2984.76	1164.36	2374.18	2216.27	1465.12	3074.27	2349.59
medium	396.389	19.9457	1060.49	1254.23	2519.16	2483.2	2086.78	2806.36	2739.58	4216.32	3548.44	4022.91	2355.5	2326.92	2930.65	1238.93	2361.28	2141.13	1505.26	3050.75	2344.04
medium_large	59.0641	3.89	11.8638	10.8125	23.5575	37.06	0	0	0	8.69	14.2745	55.1887	12.7867	51.6522	14.56	0.67	36.1568	33.0179	0	30.2316	26.19
large	2366.48	192.255	472.872	802.947	731.781	1693.46	1472.76	1653.61	2395.99	1796.94	1606.54	1098.1	1045.35	967.353	970.818	383.173	700.203	576.213	270.134	346.802	475.956
indeterminante	2351.66	192.255	472.872	802.947	731.781	1693.46	1472.76	1653.61	2395.99	1796.94	1606.54	1098.1	1044.78	967.353	970.818	382.503	697.325	553.149	270.134	346.802	475.956
free_living	29.5272	9.27852	70.7699	63.2207	57.1996	60.118	71.7387	86.3763	53.055	62.1472	36.3288	91.264	36.7879	82.532	10.255	12.6497	25.0027	27.8333	6.39438	57.1906	47.5962
crevice_dwelling	2.6536	0.260823	1.68379	0.45043	1.45915	4.08235	2.72122	1.22	1.36	1.12382	1.37975	1.22743	1.80111	0	2.36467	4.49594	0.690085	0.749817	1.72222	3.43152	4.69386
tube_dwelling	0	0	1.57699	0	0.48	1.33107	0.7	4.73075	1.27	6.56074	1.62758	4.84219	11.0793	6.94414	75.167	48.2225	64.2743	50.8722	114.412	143.738	28.4984
burrowing	2.56726	0.260823	0.135662	0	0.369147	0.33	0.61	0	1.24	0	0.603871	0.560102	0.54	0	0.783451	0.815935	0.570003	0.240753	0.407858	1.41265	3.68386
epi_endozoic_phytic	83.0365	5.79531	32.2998	70.6836	188.145	323.89	489.695	611.005	1298.05	2288.3	2041.45	2720.66	1401.11	2158.84	2958.39	1151.54	2318.5	2192.51	1537.53	3130.06	2171.41
attached	2940.91	221.811	1524.38	2072.04	3269.28	4223.14	3602.83	4549.19	5225.21	6071.38	5239.46	5234.89	3517.48	3380.21	4084.06	1722.4	3254.77	2825.47	1926.73	3604.3	3035.18
filter_suspensionfeeder	7.9147	7.0266	53.4641	29.4876	49.0354	33.3727	61.3512	68.477	33.3474	38.2555	13.1464	61.4946	26.7248	25.0558	2.68594	9.77183	4.59876	1.07016	4.16591	34.2134	39.0477
surface_deposit_feeder	2956.08	222.951	1525.56	2072.34	3269.28	4223.14	3602.83	4549.19	5232.44	6079.24	5239.85	5235.62	3518.05	3380.21	4084.06	1725.39	3257.65	2848.54	1926.73	3606.09	3024.3
grazer	7.14672	7.0266	50.736	29.0372	47.9454	29.6203	59.24	67.257	32.7674	11.9751	12.3705	60.0972	11.0771	12.7658	1.10472	3.77183	4.47868	0.561099	2.85155	30.4049	37.2177
opportunist_scavenger	0.340819	1.14	1.18	0.290157	0	0	0	0	7.23	25.8366	0.39	0.73	14.3866	12.29	0	2.32	0	0	0	1.78961	0.58
predator	1338.83	99.6572	1189.64	1474.52	2798.19	2811.69	2572.28	3227.51	2654.12	2925.3	2413.67	2024.86	1377.84	560.575	323.169	202.123	127.742	30.4991	86.9931	39.0979	57.801
mob_no	2938.68	221.55	1524.25	2072.04	3268.91	4222.81	3602.22	4549.19	5224.2	6071.38	5238.85	5234.33	3516.94	3380.21	4083.28	1721.58	3254.2	2825.23	1926.32	3602.88	3020.44
mob_low	10.1411	7.28743	53.5997	29.4876	49.4045	33.7027	61.9612	68.477	34.3574	38.2555	13.7502	62.0547	27.2648	25.0558	3.46939	10.5878	5.16876	1.31092	4.57376	35.6261	53.7815
mob_med	15.169	0	1.18	0	0	0	0	0	2.36	26.2966	0	0.73	16.0648	53.0592	0	2.99	3.54894	23.0641	0	1.78961	0.41
mob_high	6.78435	2.25192	43.8291	33.7331	22.1643	35.5353	39.2575	52.7793	17.5776	22.7517	23.1824	79.8053	8.38484	65.3577	7.56902	2.20782	16.855	3.69901	2.22847	46.9801	11.9885
soc_sol	210.622	23.6185	70.1904	85.0732	66.7571	92.968	57.2887	89.5687	64.325	101.735	58.3841	123.086	68.2803	98.5677	34.2581	12.6497	69.4705	41.6468	6.39438	101.355	244.567
soc_greg	98.9299	5.72082	33.3862	4.05196	22.7833	23.0455	98.2927	146.845	85.6566	62.9356	69.8936	159.501	109.749	94.9472	162.373	103.284	162.891	117.377	151.335	218.501	184.966
soc_col	2660.88	201.75	1491.57	2046.14	3236.94	4167.25	3518.99	4399.15	5128.28	5965.97	5147.19	5043.57	3376.24	3269.22	3897.69	1619.12	3047.41	2694.28	1775.39	3341.63	2653.24
1_2yr	1653.03	119.636	1309.86	1727	2588.94	3235.37	2124.68	2878.14	2714.37	2819.91	2258.33	1624.27	1611.82	790.804	832.312	585.684	866.634	643.609	502.924	635.692	893.506
3_5yr	128.643	13.1685	74.5883	137.127	244.882	399.971	451.873	547.405	1290.66	2276.63	2061.17	2784.58	1435.45	2243.72	2906.01	1040.35	2303.96	2139.96	1393.27	2951.03	2021.34
6_10yr	109.439	7.71192	43.662	101.329	195.313	350.715	486.876	610.128	1337.29	2303.59	2102.18	2823.4	1500.09	2258.53	2971.11	1090.15	2361.37	2168.79	1426.94	2955.94	2111.68
10_20yr	96.7035	5.46	5.15023	4.05196	7.93414	12.5944	68.1127	107.234	83.3766	56.3749	67.6622	104.063	98.1295	79.4991	86.4227	54.2451	98.0462	66.2642	36.5152	49.3477	149.754
over_20yr	1092.06	92.8257	205.553	267.087	484.724	635.33	1029.91	1102.78	1189.85	980.605	888.627	813.235	408.873	348.716	269.571	54.7688	11.1376	3.4677	0.407858	25.4157	18.1739
disp_1_10m	2842.41	216.09	1520.64	2068.44	3262.07	4213.97	3536.22	4443.17	5141.17	6016.13	5171.97	5130.94	3420.08	3340.85	3998.44	1671.02	3156.27	2759.48	1891.12	3555.55	2872.11
disp_10_100m	1536.37	122.287	1249.33	1560.88	3026.14	3158.1	3026.32	3789.9	3936.83	5146.97	4454.84	4803.28	2784.38	2669.68	3286.78	1293.27	2471.36	2200.67	1611.14	3199.88	2416.61
disp_100m_1km	7.14672	5.88661	24.2127	28.747	33.9454	20.8303	30.37	32.377	25.7674	11.2951	11.9805	10.0613	11.0771	4.26179	1.10472	3.77183	4.47868	0.561099	2.85155	6.40193	33.6077
disp_1_10km	0	0	1.18	0	0	0	0	0	0	7.17657	0	0.73	0	0	0	2.32	0	0	0	1.78961	0
disp_over_10km	120.883	7.97274	49.115	37.7851	30.4675	48.4598	107.98	160.013	102.194	97.1065	91.4485	184.429	122.008	117	94.7752	57.9388	118.35	93.2681	39.1515	97.7405	176.886
Asexual	2748.05	213.34	1505.65	2057.47	3236.94	4167.87	3530.67	4425.09	5142.57	5988.79	5155.37	5070.24	3385.9	3273.48	3901.47	1619.12	3058.6	2694.28	1775.39	3371.76	2828.18
Sexual	2970.44	231.09	1595.15	2135.27	3326.48	4283.26	3674.57	4635.56	5278.26	6133.53	5275.79	5326.16	3554.27	3462.74	4094.32	1735.05	3279.77	2853.3	1933.12	3661.49	3082.77
Lecithotrophic	2864.38	223.117	1544.86	2097.48	3296.01	4234.8	3566.59	4475.55	5173.94	6028.1	5184.34	5141	3431.72	3345.12	3999.54	1675.46	3163.63	2783.1	1893.97	3561.96	2917.35
Planktotrophic	106.055	9.11274	50.295	38.0752	30.4675	48.4598	107.98	160.013	111.324	106.103	91.8385	185.159	122.552	117.623	94.7752	59.5888	116.141	70.204	39.1515	99.5301	177.056
soc_greg	98.9299	5.72082	33.3862	4.05196	22.7833	23.0455	98.2927	146.845	85.6566	62.9356	69.8936	159.501	109.749	94.9472	162.373	103.284	162.891	117.377	151.335	218.501	184.966
soc_col	2660.88	201.75	1491.57	2046.14	3236.94	4167.25	3518.99	4399.15	5128.28	5965.97	5147.19	5043.57	3376.24	3269.22	3897.69	1619.12	3047.41	2694.28	1775.39	3341.63	2653.24
1_2yr	1653.03	119.636	1309.86	1727	2588.94	3235.37	2124.68	2878.14	2714.37	2819.91	2258.33	1624.27	1611.82	790.804	832.312	585.684	866.634	643.609	502.924	635.692	893.506
3_5yr	128.643	13.1685	74.5883	137.127	244.882	399.971	451.873	547.405	1290.66	2276.63	2061.17	2784.58	1435.45	2243.72	2906.01	1040.35	2303.96	2139.96	1393.27	2951.03	2021.34
6_10yr	109.439	7.71192	43.662	101.329	195.313	350.715	486.876	610.128	1337.29	2303.59	2102.18	2823.4	1500.09	2258.53	2971.11	1090.15	2361.37	2168.79	1426.94	2955.94	2111.68
10_20yr	96.7035	5.46	5.15023	4.05196	7.93414	12.5944	68.1127	107.234	83.3766	56.3749	67.6622	104.063	98.1295	79.4991	86.4227	54.2451	98.0462	66.2642	36.5152	49.3477	149.754
over_20yr	1092.06	92.8257	205.553	267.087	484.724	635.33	1029.91	1102.78	1189.85	980.605	888.627	813.235	408.873	348.716	269.571	54.7688	11.1376	3.4677	0.407858	25.4157	18.1739
disp_1_10m	2842.41	216.09	1520.64	2068.44	3262.07	4213.97	3536.22	4443.17	5141.17	6016.13	5171.97	5130.94	3420.08	3340.85	3998.44	1671.02	3156.27	2759.48	1891.12	3555.55	2872.11
disp_10_100m	1536.37	122.287	1249.33	1560.88	3026.14	3158.1	3026.32	3789.9	3936.83	5146.97	4454.84	4803.28	2784.38	2669.68	3286.78	1293.27	2471.36	2200.67	1611.14	3199.88	2416.61
disp_100m_1km	7.14672	5.88661	24.2127	28.747	33.9454	20.8303	30.37	32.377	25.7674	11.2951	11.9805	10.0613	11.0771	4.26179	1.10472	3.77183	4.47868	0.561099	2.85155	6.40193	33.6077
disp_1_10km	0	0	1.18	0	0	0	0	0	0	7.17657	0	0.73	0	0	0	2.32	0	0	0	1.78961	0
disp_over_10km	120.883	7.97274	49.115	37.7851	30.4675	48.4598	107.98	160.013	102.194	97.1065	91.4485	184.429	122.008	117	94.7752	57.9388	118.35	93.2681	39.1515	97.7405	176.886
Asexual	2748.05	213.34	1505.65	2057.47	3236.94	4167.87	3530.67	4425.09	5142.57	5988.79	5155.37	5070.24	3385.9	3273.48	3901.47	1619.12	3058.6	2694.28	1775.39	3371.76	2828.18
Sexual	2970.44	231.09	1595.15	2135.27	3326.48	4283.26	3674.57	4635.56	5278.26	6133.53	5275.79	5326.16	3554.27	3462.74	4094.32	1735.05	3279.77	2853.3	1933.12	3661.49	3082.77
Lecithotrophic	2864.38	223.117	1544.86	2097.48	3296.01	4234.8	3566.59	4475.55	5173.94	6028.1	5184.34	5141	3431.72	3345.12	3999.54	1675.46	3163.63	2783.1	1893.97	3561.96	2917.35
Planktotrophic	106.055	9.11274	50.295	38.0752	30.4675	48.4598	107.98	160.013	111.324	106.103	91.8385	185.159	122.552	117.623	94.7752	59.5888	116.141	70.204	39.1515	99.5301	177.056
Control
Traits	1980	1982	1984	1986	1988	1990	1992	1994	1996	1998	2000	2002	2004	2006	2008	2010	2012	2013	2015	2017
small	0.16	0.4	0.98	0.34	2.33	0.84	1.47	0	0	2.12	0	0.99	0.83	1.91	2.78	0.55	0.47	4.78	4.28	8.7
small_medium	665.545	440.884	548.175	381.578	295.918	644.338	441.55	670.319	938.041	1294.41	1525.58	618.717	2345.86	1764.58	563.006	1158.79	2286.86	1366.91	1974.94	1146.84
medium	1689.29	761.798	1668.51	1571.5	1769.07	1208.71	1342.43	1770.19	2345.07	2416.09	2513.03	1296.53	2621.72	2179.53	1001.69	1201.99	2274.71	1386.33	1997.48	1363.27
medium_large	113.86	132.08	81.19	69.56	156.3	0	46.68	103.62	38.03	54.95	8.57	47.95	58.29	36.22	198.89	0	40.2	27.72	75.27	41.58
large	858.802	1471.5	2058.18	2703.04	1984.36	1718.49	2125.23	3567.46	3212.77	2484.24	2128.81	2022.64	1691.95	1362.66	944.116	870.88	778.414	422.399	450.558	583.595
indeterminante	858.802	1419.18	2058.18	2703.04	1956.83	1718.49	2124.23	3546.14	3212.77	2482.73	2128.81	2017.55	1660.03	1360.66	786.386	870.88	775.174	422.399	444.278	578.515
free_living	4.32	62.51	83.18	101.45	33.75	24.71	16.21	40.33	60.23	13.02	32.31	108.98	34.8	3.86	188.68	7.81	22.41	51.58	96.08	128.94
crevice_dwelling	7.04	5.2	7.35	3.93	3.42	5.64	6.33	2.64	1.46	4.43	6.61	6.23	0.58	3.62	7.21	3.18	0	3.22	4.19	11.12
tube_dwelling	0	0	0	0	0	0	0	0	0	1.19	0	0	0.83	1.91	0.13	0	0.47	0.12	0.41	8.23
burrowing	7.2	4.8	6.37	3.59	1.09	4.8	4.86	2.64	1.46	3.5	6.61	6.23	0.58	3.62	4.56	2.63	0	0.23	4.1	10.65
epi_endozoic_phytic	389.765	193.974	204.645	126.968	131.278	404.368	262.77	495.019	831.571	1203.16	1458.87	560.284	2327.67	1739.25	530.096	1137.96	2260.99	1353.78	1937.78	1040.66
attached	2933.41	2497.85	4069.22	4497.6	4015.42	3143.3	3677.38	5554.93	5642.11	5035.31	4684.81	3312.47	4325.09	3601.69	1834.11	2086.44	3094.48	1802.9	2461.38	1977.54
filter_suspensionfeeder	4.32	7.82	70.52	99.19	3.79	22.17	13.71	16.31	49.08	6.63	27.53	72.5	0	1.41	30.67	6.06	14.62	49.32	74.18	117.82
surface_deposit_feeder	2933.57	2554.55	4067.09	4497.6	4040.88	3144.48	3680.15	5577.22	5645.07	5036.82	4684.81	3317.74	4357.01	3603.69	1993.69	2086.44	3097.72	1804.23	2452.24	1955.54
grazer	4.16	7.42	14.48	98.85	1.46	21.33	10.77	15.44	34.84	5.7	27.53	26.89	0	1.41	28.02	5.51	14.62	39.73	69.97	116.24
opportunist_scavenger	0.16	4.38	55.54	0	0	1.18	1.77	0.97	17.2	0	0	45.79	0	0	1.85	0	0	6.6	2.7	1.11
predator	1681.47	1374.58	2258.07	2733.04	2531.13	1736.71	2656.42	3432.23	3495.93	3187.51	2481.53	2047.4	1117.03	1177.05	777.795	103.539	47.5193	33.4548	50.5637	98.0135
mob_no	2926.37	2493.05	4060.24	4494.01	4012.26	3138.5	3672.52	5552.29	5640.65	5031.81	4678.2	3306.24	4324.51	3598.07	1829.55	2083.81	3094.48	1797.4	2440.58	1938.7
mob_low	11.36	12.62	79.5	102.78	6.95	26.97	18.57	18.95	50.54	10.13	34.14	78.73	0.58	5.03	35.23	8.69	14.62	54.82	94.98	156.66
mob_med	0.16	52.32	55.06	0	27.53	0	2.47	22.19	14.24	1.51	0	80.83	31.92	2	157.73	0	3.24	8.27	9.92	6.19
mob_high	0	2.37	21.23	40.7	2.43	17.11	1.5	2.7	24.94	4.88	27.02	53.27	2.88	0.45	24.8	1.75	18.74	37.92	77.24	93.79
soc_sol	358.03	402.86	421.15	275.65	236.29	150.87	251.33	337.61	175.08	121.46	171.91	143.62	95.58	49.18	226.57	7.81	45.18	41.97	106.81	267.77
soc_greg	218.35	177.15	290.82	179.58	158.86	161.22	116.31	90.76	88.06	59.28	78.88	75.74	16.97	27.29	53.91	13.57	36.02	47.71	72.73	151.15
soc_col	2361.35	1980.35	3440.43	4143.82	3654.02	2855.92	3325.95	5166.89	5439.2	4867.59	4466.33	3201.81	4247.34	3529.08	1742.31	2072.87	3035.69	1764.8	2377.92	1666.49
1_2yr	1952.84	1190.33	2578.68	2812.97	2799.7	1766.56	1748.29	2822.41	2945.18	1967.6	1673.45	1480.72	1221.14	1078.42	1105.21	1000.25	818.73	480.909	717.77	994.999
3_5yr	198.012	245.38	272.575	190.218	160.01	241.987	120.193	401.434	596.382	1026.27	1366.7	524.544	2300.86	1758.24	677.116	1043.76	2222.88	1304.37	1742.92	919.298
6_10yr	238.192	218.26	421.255	146.998	160.2	293.057	123.993	304.094	610.112	996.44	1402.87	519.214	2258.13	1742.37	499.426	1049.19	2203.61	1289.55	1681.14	918.298
10_20yr	211.31	172.35	275.88	137.55	157.77	141.85	111.45	88.12	72.81	54.59	50.03	46.64	15.56	21.76	24.7	10.94	21.36	10.03	7.08	44.52
over_20yr	575.568	952.308	1025.26	1458.31	931.689	1017.61	1713.66	2283.29	2087.97	1999.87	1626.95	1369.55	822.332	747.135	215.759	39.2971	53.9193	59.1648	89.6937	147.659
disp_1_10m	2715.06	2321.1	3785.34	4356.8	3856.82	2997.49	3562.54	5464.17	5567.84	4978.15	4628.17	3288.74	4308.95	3576.31	1807.5	2073.42	3073.12	1790.36	2435.01	1894.65
disp_10_100m	2371.64	1783.07	2696.6	3079.32	2823.03	2194.6	3103.32	4138.79	4443.62	4467.98	4094.32	2587.04	3470.67	2960.58	1206.79	1240.26	2331.26	1384.61	1995.06	1338.87
disp_100m_1km	4.16	3.04	5.43	60.41	1.46	5.58	10.47	15.34	18.09	5.7	5.29	3.84	0	1.41	1.65	5.51	0.43	2.4	7.41	28.49
disp_1_10km	0	0	0	0	0	0	1.47	0.87	0	0	0	0	0	0	0	0	0	6.6	1.28	1.11
disp_over_10km	218.51	231.84	361.15	181.84	190.89	163.76	118.81	114.78	113.45	64.48	83.66	127.7	50.94	27.83	211.79	15.32	43.34	53.45	112.82	182.23
Asexual	2548.09	2185.35	3666.16	4236.1	3727.97	2913.81	3465.49	5315.57	5532.77	4898.82	4619.6	3245.78	4281.75	3540.18	1765.41	2072.87	3035.69	1770.07	2396.04	1881.12
Sexual	2937.73	2560.36	4152.4	4599.05	4049.17	3168.01	3693.59	5595.26	5702.34	5048.33	4717.12	3421.45	4359.89	3605.55	2022.79	2094.25	3116.89	1854.48	2557.46	2106.48
Lecithotrophic	2719.22	2380.84	3793.86	4417.21	3887.88	3004.25	3574.31	5500.93	5588.89	4985.36	4633.46	3297.85	4340.87	3579.72	1968.73	2078.93	3076.79	1798.03	2466.82	1956.41
Planktotrophic	218.51	183.9	361.63	181.84	163.36	164.94	119.58	94.43	116.41	62.97	83.66	123.78	19.02	25.83	55.91	15.32	40.1	61.72	108.76	178.26
